# Supplementary material for: Novel pathogenic variants in CUBN uncouple proteinuria from renal function
Source: PubMed Central journal article supplement (PMC9583559; doi:10.1186/s12967-022-03706-y), 2022-10-20

# Supplemental Figure 1

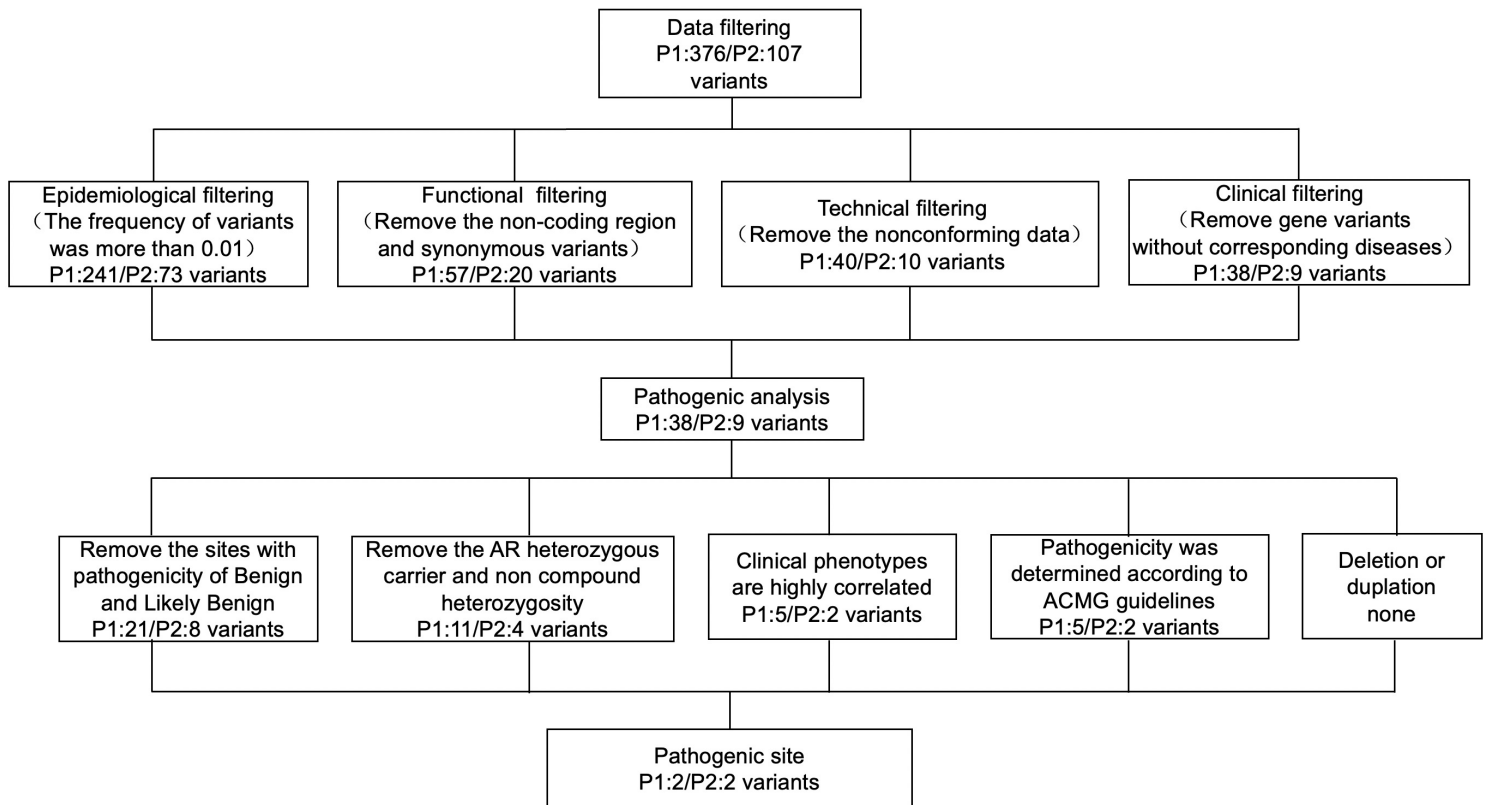

Supplement: 12967_2022_3706_MOESM1_ESM.pdf [file 12967_2022_3706_MOESM1_ESM.pdf]
